# Supplementary material
Source: PubMed Central journal article supplement (PMC4280996)
Supplement: supp_pp.114.242602_pp242602_revSupplementalData_Rev.pdf [file supp_pp.114.242602_pp242602_revSupplementalData_Rev.pdf]

**Table I. Primers used for RT-PCR.**

| Primer           | Sequence                           |
|------------------|------------------------------------|
| G35v1_EcoRV_for  | AAGATATCATGATTCTTTCATTGGAAGAGCG    |
| G35v2_EcoRV_for  | AAGATATCATGGGAGCTTTGCAGCTAAT       |
| G35_SmaI_rev     | TCCCCCGGGTCCCTGTGGAGTTTCGTGATCT    |
| G35_splicing_for | GTTGGCACCATGGGAGCTTTGCAGCT         |
| G35_genot_for    | TGTTTCCATGGGATTTATGCTCC            |
| G35_genot_rev    | TCGCCTGTACTTCATCACTCTC             |
| G35V1_NotI_for   | CTAGCGGCCGCATGATTCTTTCATTGGAAGAGCG |
| G35V1_NotI_rev   | GAATGCGGCCGCTCACTGTGGAGTTTCGTGATCT |
| AtSag12for       | ACTGGAGGAAGAAAGGAGCTGT             |
| AtSag12rev       | TGATCCGTTAGTAGATTCGCCGT            |
| ActRTfor         | ATTCAGATGCCCAGAAGTCTTGTTC          |
| ActRTrev         | ACCACCGATCCAGACACTGTACTION         |

**Supplementary figure legends:**

Movie 1. *Arabidopsis* leaves agroinfiltrated with *A. tumefaciens* strain harboring the pGREAT-2x35S-G35v1::DsRed2 construct.

Movie 2. *Arabidopsis* leaves agroinfiltrated with *A. tumefaciens* strain harboring the mito-mCherry construct that target the mCherry reporter to the mitochondria.

**Figure S1. The mitochondria isolated from Arabidopsis are enriched in cytochrome c.**

The chloroplast preparation was not contaminated by mitochondria (no cytochrome c was present). The mitochondria preparation contained a slight contamination by PsaA of Photosystem I. The 85 kDa band in the mitochondria could not be merely due to contamination by the chloroplasts, given the relative intensity of the bands recognized by the anti-GLR3.5 antibody (upper panel).

Movie 3. Ten-day-old *Arabidopsis* WT roots stained with TMRM.

Movie 4. Ten-day-old *Arabidopsis* mutant (*atglr3.5-1*) roots stained with TMRM

**Figure S2. Transcript analysis of 4 putative silenced plants.** PCR were performed with primers reported in Table I. TEM micrographs of mitochondria from GLR3.5-silenced (*glr3.5* #1 and #2) and not-silenced (*glr3.5* #3 and #4) *Arabidopsis* plants.

**Figure S3. Ultrastructure of organelles in WT, *atglr3.5-1* and silenced plants.** TEM micrographs from 3 week-old (A) or 6 week-old (B) WT Col0 and knockout plants. Upper and lower rows show representative images from WT and knockout plants, respectively. C) Representative images from non-silenced (*glr3.5* #4) and silenced plants (*glr3.5* #1 at 3 and 6 weeks).

**Figure S4.**  $[Ca^{2+}]_{mit}$  dynamics in root tip cells of WT and *atglr3.5-1* Arabidopsis seedlings expressing the 4mt-YC3.6 (mitochondrial Cameleon) probe, challenged with 0.01 mM of NAA or 0.1 mM ATP.

A-D, Root tip cells of seedlings were treated with 0.01 mM of NAA for the indicated time (black rectangles above traces) and the response of cells from the transition and elongation zones analyzed with a widefield fluorescence microscope. A, Depicted  $Ca^{2+}$  kinetics, of WT (black) and *atglr3.5-1* (grey), have been obtained averaging traces from 17 and 21 independent experiments respectively for each genotype. B, Statistical analysis of maximum  $\Delta R/R_0$  variations, occurred in both genotypes in response to the applied stimulus. C, Statistical analysis of  $\Delta R/R_0$  variations measured in both genotypes 500 sec after the sensing of the NAA. D, Statistical analysis of times at which the maximum  $\Delta R/R_0$  variations are measured in both genotypes in response to NAA.

E-H, Root tip cells of seedlings were treated with 0.1 mM of ATP for the indicated time (black rectangles above traces) and the response of cells from the meristematic zone analyzed with a widefield fluorescence microscope. E, Depicted  $Ca^{2+}$  kinetics, for WT (black) and *atglr3.5-1* (grey), have been obtained averaging traces from 8 independent experiments for each genotype. F, Statistical analysis of maximum  $\Delta R/R_0$  variations measured in both genotypes in response to the applied stimulus. G, Statistical analysis of  $\Delta R/R_0$  variations measured in both genotypes 300 sec after the sensing of the applied stimulus. H, Statistical analysis of times at which the maximum  $\Delta R/R_0$  variations are measured in both genotypes in response to applied stimulus.

Data are reported as averages  $\pm$  SD (standard deviation) (p-values calculated by Student T-test.\* 0.111; \*\* 0.193; \*\*\* 0.011; ● 0.691; ●● 0.6; ●●● 0.895).

**Figure S5.**  $[Ca^{2+}]_{mit}$  dynamics in leaf cells of WT and *atglr3.5-1* 4-week-old Arabidopsis plants expressing the 4mt-YC3.6 (mitochondrial Cameleon) probe challenged with wounding and analyzed with a widefield fluorescence microscope. A, Depicted  $Ca^{2+}$  kinetics, for WT (black) and *atglr3.5-1* (grey), have been obtained averaging traces from 6 independent experiments for each genotype. B, Statistical analysis of maximum  $\Delta R/R_0$  variations measured in both genotypes in response to wounding. C, Statistical analysis of  $\Delta R/R_0$  variations measured in both genotypes 200 sec after wounding. D, Statistical analysis of times at which the maximum  $\Delta R/R_0$  variations are measured in both genotypes in response to wounding. E, Series of representative Ratio Images (false colours) of leaf from WT and *atglr3.5-1* subjected to wounding. Data are reported as averages  $\pm$  SD (standard deviation) (p-values calculated by Student T-test.\* 0.016; \*\* 0.306; \*\*\* 0.094).

Figure S1.

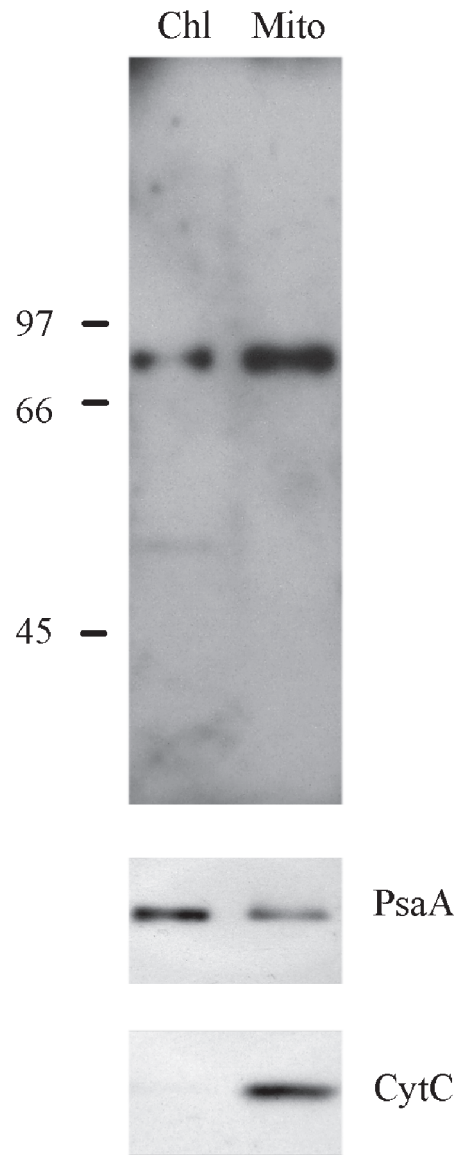

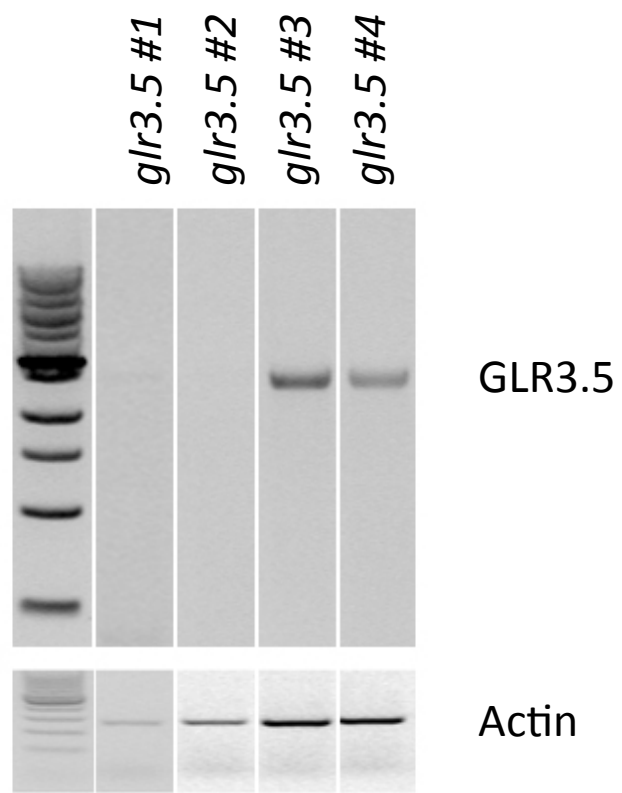

Figure S .

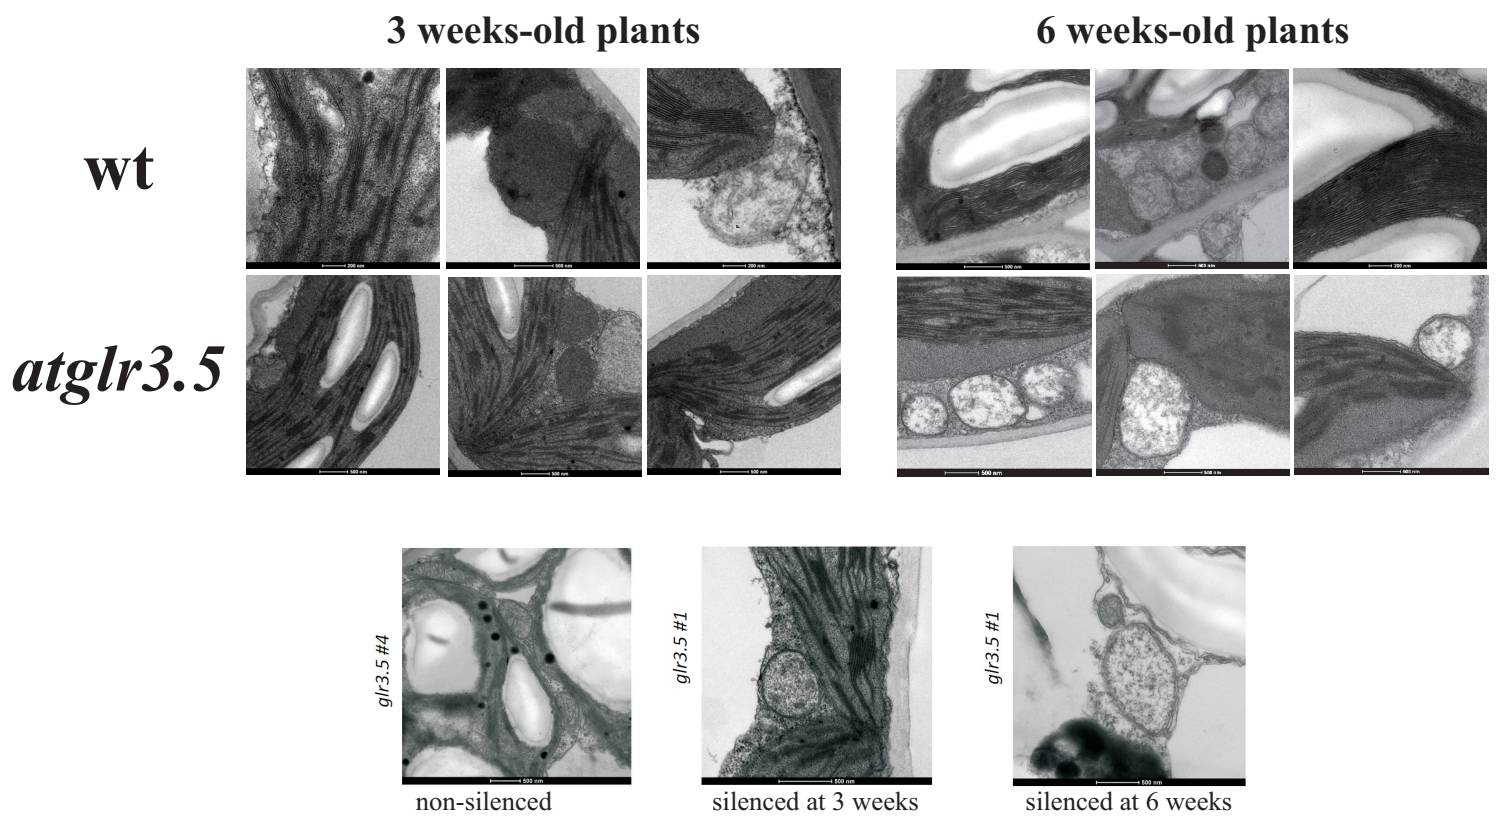

FIGURE S3

# FIGURE S4

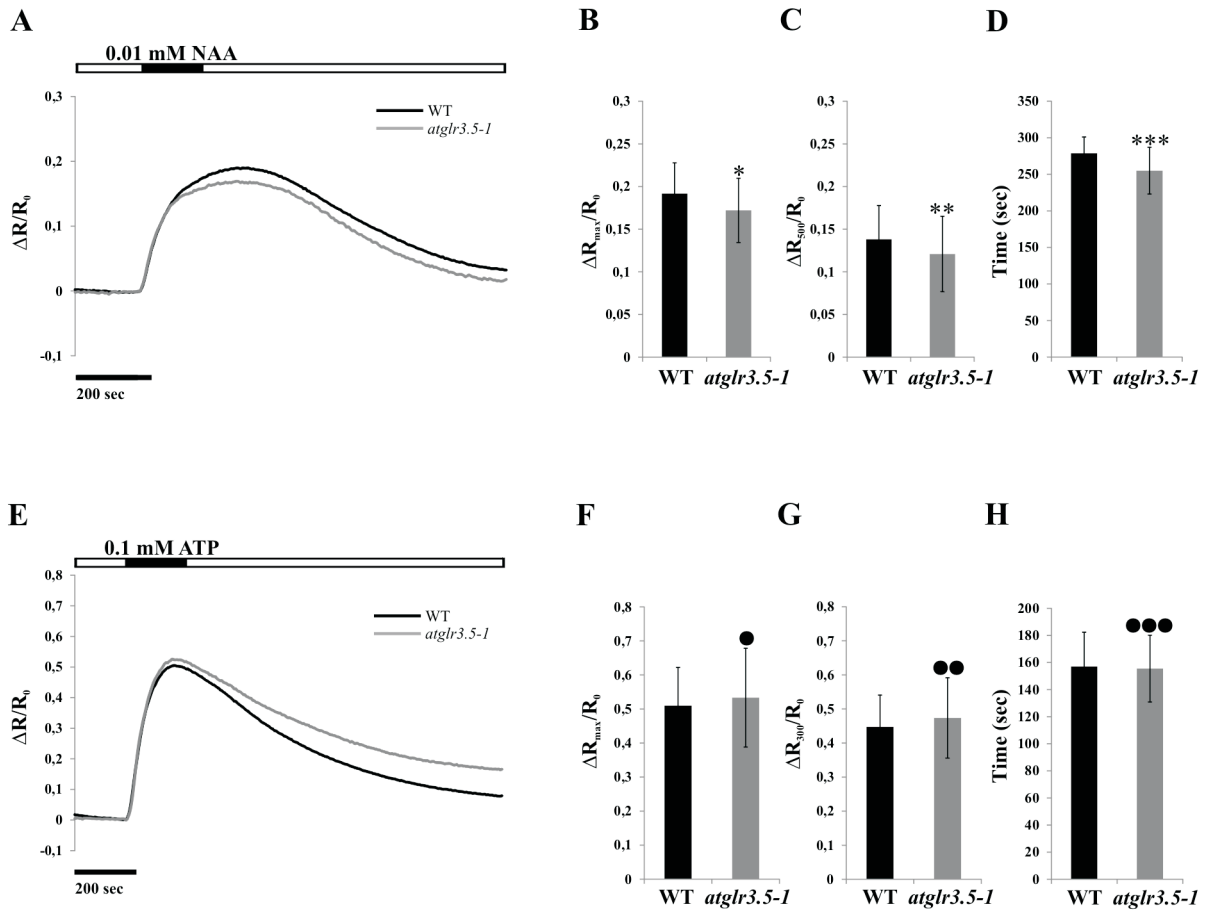

**Figure S3.**  $[Ca^{2+}]_{mit}$  dynamics in root tip cells of WT and *atglr3.5-1* Arabidopsis seedlings expressing the 4mt-YC3.6 (mitochondrial Cameleon) probe, challenged with 0.01 mM of NAA or 0.1 mM ATP.

A-D, Root tip cells of seedlings were treated with 0.01 mM of NAA for the indicated time (black rectangles above traces) and the response of cells from the transition and elongation zones analyzed with a widefield fluorescence microscope. A, Depicted  $Ca^{2+}$  kinetics, of WT (black) and *atglr3.5-1* (grey), have been obtained averaging traces from 17 and 21 independent experiments respectively for each genotype. B, Statistical analysis of maximum  $\Delta R/R_0$  variations, occurred in both genotypes in response to the applied stimulus. C, Statistical analysis of  $\Delta R/R_0$  variations measured in both genotypes 500 sec after the sensing of the NAA. D, Statistical analysis of times at which the maximum  $\Delta R/R_0$  variations are measured in both genotypes in response to NAA.

E-H, Root tip cells of seedlings were treated with 0.1 mM of ATP for the indicated time (black rectangles above traces) and the response of cells from the meristematic zone analyzed with a widefield fluorescence microscope. E, Depicted  $Ca^{2+}$  kinetics, for WT (black) and *atglr3.5-1* (grey), have been obtained averaging traces from 8 independent experiments for each genotype. F, Statistical analysis of maximum  $\Delta R/R_0$  variations measured in both genotypes in response to the applied stimulus. G, Statistical analysis of  $\Delta R/R_0$  variations measured in both genotypes 300 sec after the sensing of the applied stimulus. H, Statistical analysis of times at which the maximum  $\Delta R/R_0$  variations are measured in both genotypes in response to applied stimulus.

Data are reported as averages  $\pm$  SD (standard deviation) (p-values calculated by Student T-test. \* 0.111; \*\* 0.193; \*\*\* 0.011; ● 0.691; ●● 0.6; ●●● 0.895).

Figure S5.

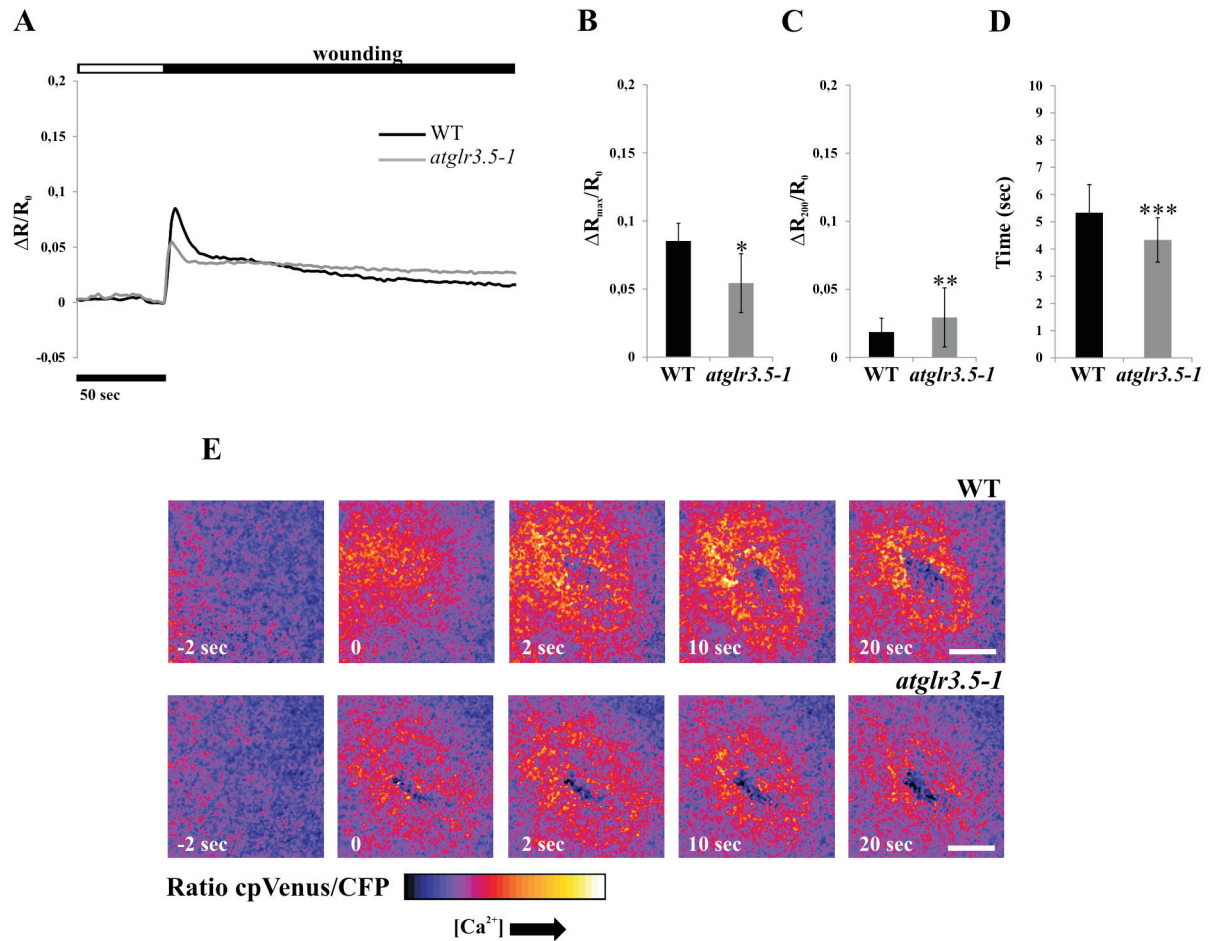

**Figure S4.**  $[Ca^{2+}]_{mit}$  dynamics in leaf cells of WT and *atglr3.5-1* 4-week-old Arabidopsis plants expressing the 4mt-YC3.6 (mitochondrial Cameleon) probe challenged with wounding and analyzed with a widefield fluorescence microscope. A, Depicted  $Ca^{2+}$  kinetics, for WT (black) and *atglr3.5-1* (grey), have been obtained averaging traces from 6 independent experiments for each genotype. B, Statistical analysis of maximum  $\Delta R/R_0$  variations measured in both genotypes in response to wounding. C, Statistical analysis of  $\Delta R/R_0$  variations measured in both genotypes 200 sec after wounding. D, Statistical analysis of times at which the maximum  $\Delta R/R_0$  variations are measured in both genotypes in response to wounding. E, Series of representative Ratio Images (false colours) of leaf from WT and *atglr3.5-1* subjected to wounding. Data are reported as averages  $\pm$  SD (standard deviation) (p-values calculated by Student T-test. \* 0.016; \*\* 0.306; \*\*\* 0.094).

| name    | Assay ID  | Assay Mix | Forward Primer Seq.      | Reverse Primer Seq.       | Reporter Dye | Reporter Sequence        |
|---------|-----------|-----------|--------------------------|---------------------------|--------------|--------------------------|
| G3.5v1  | AIY9ZX4   | 20x       | CAGGACACTAATTGCAGTGGATTT | TTATGTGACCAATTCCTGAAGATTG | FAM          | TGGGAGCTAATGGAGAACA      |
| G3.5v2  | AI0IX4C   | 20x       | CAGGACACTAATTGCAGTGGATTT | TTATGTGACCAATTCCTGAAGATTG | FAM          | TTTGCAGCTAATGGAGAACA     |
| actin 2 | At0232991 | 20x       | nd                       | nd                        | FAM          | TCGGTGGTTCCATTCTTGCTTCCC |

## TABLE II
